# Supplementary material for: Impact of residential water saving devices on urban water security: the case of Beijing, China
Source: Royal Society of Chemistry journal article supplement (doi:10.1039/d1ew00669j), 2021-11-09
Supplement: d1ew00669j1.pdf [file d1ew00669j1.pdf]

## Appendix tables

Table 1 Economic elasticity coefficient

| Year | Income | IR   | Ela <sub>1</sub><br>F <sub>j,n</sub> (j=3) | Ela <sub>2</sub><br>F <sub>k,n</sub><br>(k=1-3) | Ela <sub>3</sub><br>F <sub>3,n</sub> | Ela <sub>4</sub><br>F <sub>4,n</sub> | Ela <sub>5</sub><br>F <sub>5,n</sub> | Ela <sub>6</sub><br>F <sub>6,n</sub> |
|------|--------|------|--------------------------------------------|-------------------------------------------------|--------------------------------------|--------------------------------------|--------------------------------------|--------------------------------------|
| 2000 | 9230   |      |                                            |                                                 |                                      |                                      |                                      |                                      |
| 2005 | 16853  | 11.7 | 0.0000                                     | 0.0000                                          | 0.0184                               | 0.0000                               | 0.0000                               | 0.0214                               |
| 2010 | 29228  | 13.2 | -0.0190                                    | -0.0127                                         | 0.0134                               | 0.0000                               | 0.0000                               | 0.0253                               |
| 2015 | 48458  | 10.9 | -0.0307                                    | 0.0000                                          | 0.0000                               | 0.0000                               | 0.0000                               | 0.0230                               |
| 2020 | 67756  | 8.8  | -0.0285                                    | -0.0228                                         | 0.0228                               | 0.0000                               | 0.0000                               | 0.0228                               |
| 2025 | 79446  | 7.5  | -0.0195                                    | -0.0089                                         | 0.0136                               | 0.0000                               | 0.0000                               | 0.0230                               |
| 2030 | 85741  | 6.5  | -0.0195                                    | -0.0089                                         | 0.0136                               | 0.0000                               | 0.0000                               | 0.0230                               |

Table 2 Variables of water consumption behaviors

| Year | F <sub>j,n</sub> (j=1-5) |      |      |      |      | F <sub>k,n</sub> (k=1-4) |      |      |      | F <sub>i,n</sub> (i=3-6) |      |      |      |
|------|--------------------------|------|------|------|------|--------------------------|------|------|------|--------------------------|------|------|------|
|      | j=1                      | j=2  | j=3  | j=4  | j=5  | k=1                      | k=2  | k=3  | k=4  | i=3                      | i=4  | i=5  | i=6  |
| 2000 | 2.00                     | 6.00 | 0.57 | 0.14 | 0.50 | 3.00                     | 3.00 | 3.00 | 3.50 | 0.10                     | 0.00 | 4.50 | 0.17 |
| 2005 | 2.00                     | 6.00 | 0.57 | 0.14 | 0.36 | 3.00                     | 3.00 | 3.00 | 3.50 | 0.12                     | 0.00 | 5.00 | 0.21 |
| 2010 | 2.00                     | 6.00 | 0.43 | 0.14 | 0.21 | 2.50                     | 2.50 | 2.50 | 3.50 | 0.14                     | 0.00 | 6.50 | 0.29 |
| 2015 | 2.00                     | 6.00 | 0.29 | 0.14 | 0.06 | 2.50                     | 2.50 | 2.50 | 3.50 | 0.14                     | 0.00 | 7.50 | 0.36 |
| 2019 | 2.00                     | 6.00 | 0.21 | 0.14 | 0.06 | 2.00                     | 2.00 | 2.00 | 3.50 | 0.17                     | 0.00 | 8.00 | 0.43 |
| 2025 | 2.00                     | 6.00 | 0.18 | 0.14 | 0.06 | 1.87                     | 1.87 | 1.87 | 3.50 | 0.19                     | 0.00 | 8.00 | 0.50 |
| 2030 | 2.00                     | 6.00 | 0.16 | 0.14 | 0.06 | 1.76                     | 1.76 | 1.76 | 3.50 | 0.21                     | 0.00 | 8.00 | 0.58 |

  

| Year | q <sub>j,n</sub> (j=1-5) |     |      |      |      | q <sub>k,n</sub> (j=1-4) |      |     |     | q <sub>i,n</sub> (i=3-5) |      |     |
|------|--------------------------|-----|------|------|------|--------------------------|------|-----|-----|--------------------------|------|-----|
|      | j=1                      | j=2 | j=3  | j=4  | j=5  | k=1                      | k=2  | k=3 | k=4 | i=3                      | i=4  | i=5 |
| 2000 | 2.0                      | 1.5 | 12.0 | 12.0 | 12.0 | 8.0                      | 8.0  | 2.0 | 2.0 | 130                      | 13.5 | 8.0 |
| 2005 | 2.0                      | 1.5 | 12.0 | 12.0 | 12.0 | 8.0                      | 8.0  | 2.0 | 2.0 | 130                      | 13.5 | 8.0 |
| 2010 | 2.0                      | 1.5 | 12.0 | 12.0 | 8.0  | 8.0                      | 8.0  | 2.4 | 2.0 | 130                      | 13.5 | 8.0 |
| 2015 | 2.0                      | 1.5 | 12.0 | 12.0 | 6.0  | 9.0                      | 12.0 | 2.4 | 2.0 | 130                      | 13.5 | 8.0 |
| 2019 | 2.0                      | 1.5 | 12.0 | 12.0 | 6.0  | 9.0                      | 12.0 | 3.2 | 2.0 | 130                      | 13.5 | 8.0 |
| 2025 | 2.0                      | 1.5 | 12.0 | 12.0 | 6.0  | 10.0                     | 14.0 | 3.2 | 2.0 | 130                      | 13.5 | 8.0 |
| 2030 | 2.0                      | 1.5 | 12.0 | 12.0 | 6.0  | 10.0                     | 14.0 | 3.2 | 2.0 | 130                      | 13.5 | 8.0 |

  

| Year | T <sub>6,n</sub> | E <sub>1</sub> | E <sub>2</sub> | E <sub>3</sub> | E <sub>4</sub> | E <sub>5</sub> | E <sub>6</sub> | h <sub>n</sub> | EG <sub>6,L</sub> |
|------|------------------|----------------|----------------|----------------|----------------|----------------|----------------|----------------|-------------------|
| 2000 | 20               | 1              | 1              | 1              | 0              | 1              | 1              | 3.5            | 0.15              |
| 2005 | 18               | 1              | 1              | 1              | 0              | 1              | 1              | 3.5            | 0.15              |
| 2010 | 16               | 1              | 1              | 1              | 0              | 1              | 1              | 3.5            | 0.15              |
| 2015 | 16               | 1              | 1              | 1              | 0              | 1              | 1              | 3.5            | 0.15              |
| 2019 | 15               | 1              | 1              | 1              | 0              | 1              | 1              | 3.5            | 0.15              |
| 2025 | 15               | 1              | 1              | 1              | 0              | 1              | 1              | 3.5            | 0.15              |
| 2030 | 15               | 1              | 1              | 1              | 0              | 1              | 1              | 3.5            | 0.15              |

Table 3 Penetration rate of water saving devices in Beijing households

| Penetration rate of water saving devices |        |        |       |                |
|------------------------------------------|--------|--------|-------|----------------|
| Year                                     | Shower | Toilet | basin | Clothes washer |
| 2000                                     | 0      | 0      | 0     | 0              |
| 2005                                     | 5      | 29     | 17    | 2              |
| 2010                                     | 23     | 60     | 27    | 13             |
| 2015                                     | 35     | 66     | 38    | 28             |
| 2019                                     | 42     | 72     | 47    | 36             |
| 2025                                     | 57     | 77     | 62    | 51             |
| 2030                                     | 72     | 80     | 75    | 66             |
